# Supplementary material for: Dietary Fiber Intake Alters Gut Microbiota Composition but Does Not Improve Gut Wall Barrier Function in Women with Future Hypertensive Disorders of Pregnancy
Source: MDPI journal article supplement (doi:10.3390/nu12123862), 2020-12-17
Supplement: s1 [file s1]

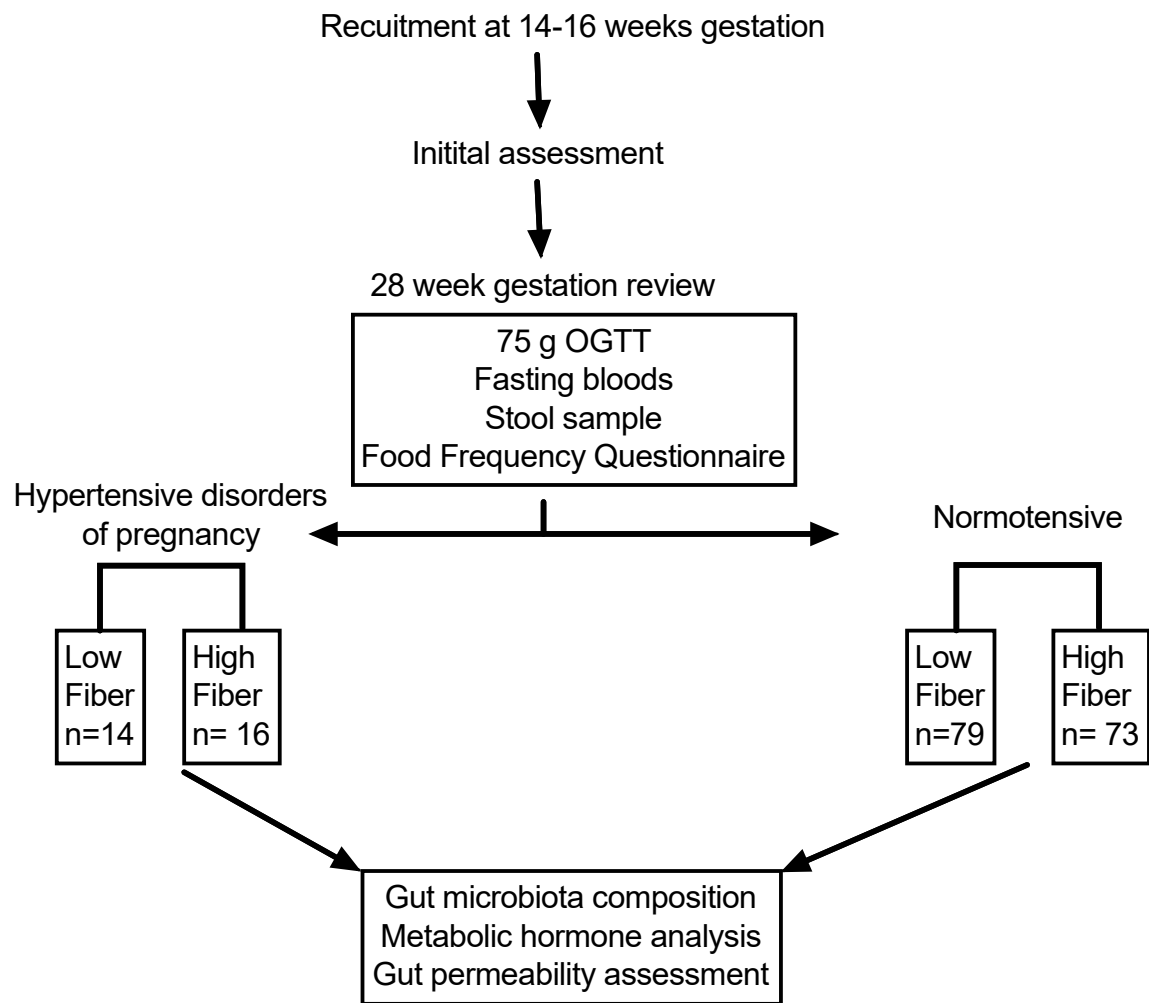

Figure 1. Study overview.

**Table 1.** Participant Characteristic HDP vs Normotensive Groups in the subgroup analysed for metabolic hormones and zonulin levels at 28 weeks.

|                                            | Hypertensive Disorders of<br>Pregnancy | Normotensive | P-<br>value  |
|--------------------------------------------|----------------------------------------|--------------|--------------|
| N                                          | 19                                     | 36           | NA           |
| Maternal age (years)                       | 36.7 (1.4)                             | 34.4 (0.29)  | 0.16         |
| Maternal baseline BMI (kg/m <sup>2</sup> ) | 35.9 (1.6)                             | 32.7 (1.1)   | 0.09         |
| SBP (mmHg)                                 | 118 (2.6)                              | 110 (1.5)    | <b>0.006</b> |
| DBP (mmHg)                                 | 73 (1.9)                               | 65 (1.3)     | <b>0.002</b> |
| Fasting glucose (mmol/L)                   | 4.5 (0.1)                              | 4.2 (0.1)    | <b>0.005</b> |
| GDM N (%)                                  | 6 (32)                                 | 0 (0)        | <b>0.001</b> |
| Total cholesterol (mmol/L)                 | 6.3 (0.3)                              | 6.5 (0.2)    | 0.69         |
| Circulating Triglycerides<br>(mmol/L)      | 2.3 (0.2)                              | 2.1 (0.2)    | 0.48         |
| Daily Energy Intake (kJ)                   | 6001 (300)                             | 7168 (444)   | 0.09         |
| Fiber intake (g/day)                       | 18.2 (1.2)                             | 21.0 (1.8)   | 0.30         |
| Energy-corrected fiber intake<br>(mg/kJ)   | 2.9 (0.2)                              | 2.9 (0.2)    | 0.60         |
| Low Fiber/High Fiber (N)                   | 10/8*                                  | 19/17        | 1.0          |
| Carbohydrates (g/day)                      | 143.9 (7.5)                            | 180.7 (11.4) | <b>0.04</b>  |
| Starch (g/day)                             | 72.3 (4.5)                             | 97.9 (6.8)   | <b>0.01</b>  |
| Protein (g/day)                            | 69.9 (4.6)                             | 82.3 (5.6)   | 0.16         |
| Total Fats(g/day)                          | 64.9 (3.9)                             | 74.2 (5.0)   | 0.23         |
| Saturated Fats (g/day)                     | 28.3 (1.8)                             | 32.1 (2.4)   | 0.30         |

Results presented as mean with the standard error of the mean (SEM) unless otherwise mentioned. Comparisons between groups were performed with unpaired Student t-tests, apart from rate of GDM which was assessed with Fisher's exact test. \*, data missing from one individual; BMI, Body Mass Index; SBP, systolic blood pressure; DBP, diastolic blood pressure.
